# Supplementary material
Source: PubMed Central journal article supplement (PMC4963260)
Supplement: NIHMS761062-supplement-Supp_Table_S1.pdf [file NIHMS761062-supplement-Supp_Table_S1.pdf]

**Supplementary table 1.** Patient information.

| <b>Experiment</b> | <b>OA status</b> | <b>N</b> | <b>Age<br/>(average±SD)</b> |
|-------------------|------------------|----------|-----------------------------|
| Methylation       | Normal           | 11       | 23±4                        |
|                   | OA               | 12       | 69±9                        |
| RNAseq            | Normal           | 8        | 33±12                       |
|                   | OA               | 10       | 72±10                       |
| qPCR              | Normal           | 20       | 36±4                        |
|                   | OA               | 20       | 66±3                        |
