# Supplementary material
Source: PubMed Central journal article supplement (PMC4963260)
Supplement: NIHMS761062-supplement-Supp_Table_S3.pdf [file NIHMS761062-supplement-Supp_Table_S3.pdf]

**Supplementary table 3.** GO term analysis of the 929 differentially methylated CpG sites in knee articular cartilage from normal and osteoarthritis patients.

| GO term                                                         | Number of DMG | % enrichment | Corrected P-value |
|-----------------------------------------------------------------|---------------|--------------|-------------------|
| fibroblast growth factor-activated receptor activity            | 4             | 80%          | 1.15E-02          |
| somatic stem cell maintenance                                   | 9             | 19%          | 4.38E-03          |
| integrin-mediated signaling pathway                             | 11            | 10%          | 6.26E-02          |
| heparin binding                                                 | 15            | 10%          | 2.89E-02          |
| homophilic cell adhesion via plasma membrane adhesion molecules | 14            | 10%          | 1.69E-02          |
| positive regulation of Rho GTPase activity                      | 14            | 9%           | 2.47E-02          |
| regulation of Rho GTPase activity                               | 16            | 9%           | 1.31E-02          |
| regulation of canonical Wnt signaling pathway                   | 14            | 9%           | 3.70E-02          |
| regulation of Wnt signaling pathway                             | 19            | 9%           | 6.34E-03          |
| skeletal muscle organ development                               | 16            | 9%           | 2.32E-02          |
| regulation of Rho protein signal transduction                   | 17            | 8%           | 1.79E-02          |
| canonical Wnt signaling pathway                                 | 18            | 8%           | 1.33E-02          |
| fat cell differentiation                                        | 15            | 8%           | 5.21E-02          |
| regulation of Ras protein signal transduction                   | 33            | 8%           | 8.23E-05          |
| actin cytoskeleton organization                                 | 40            | 8%           | 1.37E-05          |
| regulation of Ras GTPase activity                               | 26            | 8%           | 2.01E-03          |
| Wnt signaling pathway                                           | 27            | 8%           | 1.59E-03          |
| stem cell development                                           | 20            | 8%           | 1.46E-02          |
| actin filament organization                                     | 21            | 8%           | 1.10E-02          |
| regulation of small GTPase mediated signal transduction         | 36            | 7%           | 8.98E-05          |
| actin filament-based process                                    | 44            | 7%           | 1.37E-05          |
| GTPase regulator activity                                       | 22            | 7%           | 3.62E-02          |
| ossification                                                    | 27            | 7%           | 3.33E-03          |
| regulation of GTPase activity                                   | 36            | 7%           | 2.39E-04          |
| positive regulation of Ras GTPase activity                      | 20            | 7%           | 3.49E-02          |
| regulation of GTP catabolic process                             | 36            | 7%           | 2.42E-04          |
| positive regulation of GTPase activity                          | 32            | 7%           | 1.62E-03          |
| regulation of purine nucleotide catabolic process               | 37            | 7%           | 5.92E-04          |
| regulation of nucleotide catabolic process                      | 37            | 7%           | 5.92E-04          |
| actin binding                                                   | 26            | 7%           | 3.62E-02          |
| regulation of nucleoside metabolic process                      | 37            | 7%           | 7.23E-04          |
| negative regulation of intracellular signal transduction        | 23            | 7%           | 3.34E-02          |
| Ras protein signal transduction                                 | 33            | 6%           | 4.28E-03          |
| skeletal system development                                     | 29            | 6%           | 1.19E-02          |
| embryonic morphogenesis                                         | 35            | 6%           | 4.43E-03          |
| negative regulation of signal transduction                      | 56            | 6%           | 7.48E-05          |
| regulation of purine nucleotide metabolic process               | 41            | 6%           | 2.25E-03          |
| regulation of nucleotide metabolic process                      | 41            | 6%           | 2.40E-03          |
| regulation of catabolic process                                 | 54            | 6%           | 1.27E-04          |
| negative regulation of signaling                                | 57            | 6%           | 8.23E-05          |
| negative regulation of cell communication                       | 57            | 6%           | 8.23E-05          |
| cytoskeleton organization                                       | 57            | 6%           | 8.92E-05          |
| regulation of cellular catabolic process                        | 47            | 6%           | 1.62E-03          |
| GTP catabolic process                                           | 41            | 6%           | 4.96E-03          |
| cytoskeletal protein binding                                    | 44            | 6%           | 1.15E-02          |
| guanosine-containing compound catabolic process                 | 41            | 6%           | 5.61E-03          |
| GTP metabolic process                                           | 41            | 5%           | 6.62E-03          |
| organ morphogenesis                                             | 50            | 5%           | 1.62E-03          |
| guanosine-containing compound metabolic process                 | 41            | 5%           | 8.79E-03          |

|                                                    |    |    |          |
|----------------------------------------------------|----|----|----------|
| negative regulation of response to stimulus        | 60 | 5% | 3.27E-04 |
| positive regulation of hydrolase activity          | 44 | 5% | 6.70E-03 |
| regulation of cell development                     | 38 | 5% | 2.95E-02 |
| embryo development                                 | 56 | 5% | 1.59E-03 |
| regulation of anatomical structure morphogenesis   | 39 | 5% | 3.62E-02 |
| regulation of intracellular signal transduction    | 77 | 5% | 8.23E-05 |
| cell adhesion                                      | 54 | 5% | 3.59E-03 |
| biological adhesion                                | 54 | 5% | 4.31E-03 |
| cell morphogenesis involved in differentiation     | 42 | 5% | 3.34E-02 |
| cell motility                                      | 58 | 5% | 3.14E-03 |
| localization of cell                               | 58 | 5% | 3.14E-03 |
| cell migration                                     | 53 | 5% | 6.34E-03 |
| cell morphogenesis                                 | 57 | 5% | 4.43E-03 |
| enzyme linked receptor protein signaling pathway   | 50 | 5% | 1.37E-02 |
| cellular component morphogenesis                   | 60 | 5% | 4.11E-03 |
| cell projection organization                       | 58 | 5% | 4.96E-03 |
| neuron development                                 | 47 | 5% | 5.27E-02 |
| locomotion                                         | 70 | 5% | 3.49E-03 |
| regulation of hydrolase activity                   | 55 | 5% | 3.14E-02 |
| movement of cell or subcellular component          | 77 | 5% | 2.33E-03 |
| regulation of cell differentiation                 | 63 | 4% | 1.37E-02 |
| generation of neurons                              | 61 | 4% | 1.79E-02 |
| cell development                                   | 87 | 4% | 1.59E-03 |
| regulation of multicellular organismal development | 64 | 4% | 2.47E-02 |
| positive regulation of molecular function          | 70 | 4% | 1.38E-02 |
| organonitrogen compound catabolic process          | 61 | 4% | 5.08E-02 |
| regulation of developmental process                | 82 | 4% | 4.96E-03 |
| regulation of phosphate metabolic process          | 81 | 4% | 5.84E-03 |
| regulation of phosphorus metabolic process         | 81 | 4% | 6.74E-03 |
| tissue development                                 | 76 | 4% | 1.33E-02 |

---
